# Supplementary material
Source: PubMed Central journal article supplement (PMC3346443)
Supplement: supp_78.9.3185_AEM-AEM00085-12-s01.pdf [file supp_78.9.3185_AEM-AEM00085-12-s01.pdf]

TABLE S1. Strains used in this study

| Species                                        | Strain <sup>a</sup>                  | Origin                           |
|------------------------------------------------|--------------------------------------|----------------------------------|
| Lactic acid bacteria                           |                                      |                                  |
| <i>Lactococcus lactis</i> subsp. <i>lactis</i> | S3+                                  | Artisanal fresh cheese           |
| <i>Lactococcus lactis</i> subsp. <i>lactis</i> | S3-                                  | Protease-negative variant of S3+ |
| Aerobic ripening bacteria                      |                                      |                                  |
| <i>Arthrobacter arilaitensis</i>               | Re117 <sup>T</sup> (= CIP 108037)    | Reblochon cheese                 |
| <i>Arthrobacter arilaitensis</i>               | 2L34                                 | Livarot cheese                   |
| <i>Arthrobacter arilaitensis</i>               | Ep104                                | Epoisses cheese                  |
| <i>Arthrobacter arilaitensis</i>               | 3M03                                 | Livarot cheese                   |
| <i>Arthrobacter arilaitensis</i>               | Mu107                                | Munster cheese                   |
| <i>Arthrobacter arilaitensis</i>               | Ma107                                | Maroilles cheese                 |
| <i>Arthrobacter arilaitensis</i>               | GMPA29                               | Soft cheese                      |
| <i>Brevibacterium aurantiacum</i>              | BLE3                                 | Commercial ripening strain       |
| <i>Brevibacterium aurantiacum</i>              | ATCC 9174                            | Romadur cheese                   |
| <i>Brevibacterium aurantiacum</i>              | 2M23                                 | Livarot cheese                   |
| <i>Brevibacterium aurantiacum</i>              | ATCC 9175 <sup>T</sup>               | Camembert cheese                 |
| <i>Brevibacterium aurantiacum</i>              | BA 171                               | Beaufort cheese                  |
| <i>Brevibacterium linens</i>                   | ATCC 9172 <sup>T</sup>               | Harzer cheese                    |
| <i>Brevibacterium antiquum</i>                 | CNRZ 918                             | Gruyère de Comté cheese          |
| <i>Corynebacterium casei</i>                   | DPC 5298 <sup>T</sup> (= CIP 107182) | Gubbeen cheese                   |
| <i>Corynebacterium casei</i>                   | UCMA 3821                            | Livarot cheese                   |
| <i>Corynebacterium variabile</i>               | Mu133                                | Vacherin cheese                  |
| <i>Corynebacterium variabile</i>               | DPC 5310 (= CIP 107183)              | Gubbeen cheese                   |
| <i>Corynebacterium flavescens</i>              | Mu128                                | Munster cheese                   |
| Yeast                                          |                                      |                                  |
| <i>Debaryomyces hansenii</i>                   | 304                                  | Goat cheese                      |

<sup>a</sup> Strains are from the following collections: American Type Culture Collection (ATCC), Rockville, MD, USA; Dairy products Research Centre (DPC), Moorepark, Fermoy, Ireland; Collection de l'Institut Pasteur (CIP), Paris, France; Centre National de Recherches Zootechniques (CNRZ): collection now transferred to the Centre International de Ressources Microbiennes (CIRM), Rennes, France. Strains 2L34, 3M03, UCMA 3821 and 2M23 are from LMILA (Laboratoire des Micro-organismes d'Intérêt Laitier et Alimentaire, Caen, France), and strain BLE3 is from Cargill (La Ferté-sous-Jouarre, France). The other strains are from the GMPA culture collection (Unité Mixte de Recherche Génie et Microbiologie des Procédés Alimentaires, Thiverval-Grignon, France).

TABLE S2. *Arthrobacter arilaitensis* Re117 gene primers used in this study

| Gene <sup>a</sup>                                       | Gene product                                                   | Primer sequence (5' → 3')<br>F = forward, R = reverse   |
|---------------------------------------------------------|----------------------------------------------------------------|---------------------------------------------------------|
| AARI_02870                                              | iron-siderophore ABC transporter, substrate-binding protein    | F: CTGATCGTGGTCTCCACCTC<br>R: CTCCAGTCCTTGTCACCGT       |
| AARI_03970                                              | iron-siderophore ABC transporter, substrate-binding protein    | F: GAAGCTGTCATTGCGGAACAC<br>R: CCGTTTGTGGGCGTGA         |
| AARI_03980                                              | iron-siderophore ABC transporter, substrate-binding protein    | F: CAATGAAGTCTGACGCAAAT<br>R: AGGTCGTTCTCGGTGACAA       |
| AARI_10870                                              | iron-siderophore ABC transporter, substrate-binding protein    | F: GGTATCGGCACCGCAT<br>R: CGCAGTATCCGCTGACG             |
| AARI_15020                                              | iron-siderophore ABC transporter, substrate-binding protein    | F: GCCGAAGTGGTGGCCTACA<br>R: GTGATGGTGCCGACGTTTAC       |
| AARI_26370                                              | iron-siderophore ABC transporter, substrate-binding protein    | F: ACCGCCTACGTCTACTCC<br>R: ATCCGAGTCCCCTCGTTGA         |
| AARI_30210                                              | iron-siderophore ABC transporter, substrate-binding protein    | F: GCGGTTGTCTCACTCGAATC<br>R: GGAGAAGTCGGTCTTGAAGTCTG   |
| AARI_32450                                              | iron-siderophore ABC transporter, substrate-binding protein    | F: CACCCTGATGCCGGACA<br>R: GTCAACGGTAACGACCGATT         |
| AARI_32790                                              | iron-siderophore ABC transporter, substrate-binding protein    | F: GGTGGTCAAGAACGAAGAAGC<br>R: TCGGTGTACTGCGGGTAG       |
| AARI_26120                                              | iron/manganese/zinc ABC transporter, substrate-binding protein | F: CGGACGGTGTCTGGCAAA<br>R: GCGTGCATGAGCGTGAT           |
| AARI_29890 and 30460                                    | iron/manganese/zinc ABC transporter, substrate-binding protein | F: CTGCGAAAGCTGACCTGAT<br>R: CGTCACTGACAACAGCGT         |
| AARI_16210                                              | putative divalent metal ion transporter                        | F: CATCTCCGGTGGCGACAA<br>R: CGGCCAGAAAGCCAATC           |
| AARI_18090                                              | metal ion transporter                                          | F: ATCAGCGCATTGCCTTG<br>R: GGACGAGGTCTTCGACGAGTA        |
| AARI_09570                                              | pyridoxal-dependent amino acid decarboxylase                   | F: TGGACGGCATCGAGCAG<br>R: GATTCAAGGTTGGAGCGTT          |
| AARI_09550                                              | siderophore biosynthesis protein                               | F: CCCTGTCCAGCCACTGTGA<br>R: TCGGTGATGGAGATTCAATGAG     |
| AARI_09560                                              | L-lysine 6-monooxygenase (NADPH)                               | F: CGCGGAAATCTTCTCGAC<br>R: TCCAAGGTGAGCTTGGTGTGA       |
| AARI_32920                                              | isochorismatase                                                | F: AATGACGGTCCGGAAAGAAATTAC<br>R: CGCATCCATTCTGGAGTT    |
| AARI_32910                                              | 2,3-dihydro-2,3-dihydroxybenzoate dehydrogenase                | F: GACCGCCGATATCAGTTTAC<br>R: CCACATTGACCAGGCCTT        |
| AARI_32900                                              | isochorismate synthase                                         | F: CCGGTCTCTACTGTGTC<br>R: CATTCGCCTTACCCTCTT           |
| AARI_32890                                              | non-ribosomal siderophore peptide synthetase component         | F: CGGCGGCGAGAAGATCA<br>R: GTGCGTTCGTTTCGCCCA           |
| AARI_26600                                              | ferritin-like protein                                          | F: GAAGATTGGCGAGCAACCAG<br>R: CGAATCGTTCGGAGACC         |
| <i>ideR</i> (AARI_05610)                                | iron-dependent repressor IdeR                                  | F: GCGTTGACGGAGAAAGGT<br>R: ATGCTTCGTCATGGACGTATT       |
| AARI_02510                                              | ferric uptake regulation protein                               | F: ACCATTATTTCCGGCAGTCCA<br>R: GATCTGCCGGATGACGC        |
| 16S rRNA (AARI_36310, 3340, 36380, 36520, 36580, 36690) | 16S ribosomal RNA                                              | F: CCGTAGCTAACGCATTAAGTG<br>R: CCGAAGGGAAACTCCATCT      |
| <i>tuf</i> (AARI_23550)                                 | Elongation factor Tu                                           | F: CCAAGGTTCTGGCTGACAAGTA<br>R: ATGTGCGAGATGTTGATGGTAAT |
| <i>rpoA</i> (AARI_23210)                                | DNA-directed RNA polymerase alpha chain                        | F: CTTCCGTTGCGAAGTCCATT<br>R: CATCGTCGATGGCGCTAC        |
| <i>rpoB</i> (AARI_23600)                                | DNA-directed RNA polymerase beta chain                         | F: TGGAAGACGGCACTCCTTT<br>R: ATTCAGGCTCGCCTTCAAT        |
| <i>gyrB</i> (AARI_20200)                                | putative DNA gyrase subunit B                                  | F: GACGTTGTCTACCGCTACAT<br>R: TTGGTCATCTCCGCCTCAG       |
| <i>ftsZ</i> (AARI_20710)                                | cell division protein FtsZ                                     | F: ATCGAATGATCGAAGTCGGTC<br>R: TTCGCGTCTACGTCTAGT       |
| <i>recA</i> (AARI_1010)                                 | RecA bacterial DNA recombination protein                       | F: CCAACGGTTCGGTAAAC<br>R: GTCGATGAGCGAACCTTAC          |
| <i>dnaG</i> (AARI_09340)                                | DNA primase                                                    | F: TGCCAGACCTATGTCTGT<br>R: ATCTTCCGCCCTTGATGTA         |

<sup>a</sup> The *Arthrobacter arilaitensis* Re117 chromosome sequence is available in the EMBL database under accession number FQ311875.

TABLE S3. Effect of the addition of iron and desferrioxamine B on the counts of *Debaryomyces hansenii* in the model cheeses. The cheese curds were inoculated with a yeast (*Debaryomyces hansenii*) and different strains of aerobic ripening bacteria. The values are the means of three biological replicates (separate cheeses). Values in bold correspond to significant differences (Student test,  $P < 0.05$ ) between the cheeses supplemented with iron or desferrioxamine B and the corresponding control cheeses. SD = Standard deviation.

| Aerobic ripening bacteria:      | <i>Debaryomyces hansenii</i> at 12 days (cfu/g) |         |         |         |                     |         | <i>Debaryomyces hansenii</i> at 16 days (cfu/g) |         |         |         |                     |         |
|---------------------------------|-------------------------------------------------|---------|---------|---------|---------------------|---------|-------------------------------------------------|---------|---------|---------|---------------------|---------|
|                                 | Control                                         |         | + Iron  |         | + Desferrioxamine B |         | Control                                         |         | + Iron  |         | + Desferrioxamine B |         |
|                                 | Mean                                            | SD      | Mean    | SD      | Mean                | SD      | Mean                                            | SD      | Mean    | SD      | Mean                | SD      |
| <i>A. arilaitensis</i> 3M03     | 2.6E+08                                         | 1.3E+08 | 4.5E+08 | 1.4E+08 | 1.4E+08             | 2.1E+07 | 2.9E+08                                         | 4.0E+07 | 3.3E+08 | 8.3E+07 | 3.2E+08             | 5.8E+07 |
| <i>A. arilaitensis</i> Mu107    | 2.2E+08                                         | 1.0E+08 | 2.5E+08 | 4.3E+07 | 2.3E+08             | 1.3E+08 | 2.4E+08                                         | 3.2E+07 | 2.2E+08 | 9.6E+07 | 2.6E+08             | 1.1E+08 |
| <i>A. arilaitensis</i> Ma107    | 1.7E+08                                         | 5.1E+07 | 3.3E+08 | 1.5E+08 | 2.3E+08             | 4.6E+07 | 2.1E+08                                         | 5.1E+07 | 3.8E+08 | 8.3E+07 | 3.1E+08             | 2.8E+07 |
| <i>A. arilaitensis</i> GMPA29   | 1.9E+08                                         | 1.5E+08 | 2.6E+08 | 6.8E+07 | 1.3E+08             | 2.3E+07 | 2.3E+08                                         | 4.6E+07 | 2.4E+08 | 2.2E+07 | 2.0E+08             | 6.3E+07 |
| <i>A. arilaitensis</i> 2L34     | 1.5E+08                                         | 2.3E+07 | 2.1E+08 | 3.8E+07 | 1.5E+08             | 3.4E+07 | 3.2E+08                                         | 8.7E+07 | 4.8E+08 | 2.1E+08 | 3.9E+08             | 1.1E+08 |
| <i>A. arilaitensis</i> Ep104    | 1.4E+08                                         | 1.4E+07 | 1.5E+08 | 2.0E+07 | 1.9E+08             | 5.0E+07 | 3.2E+08                                         | 6.3E+07 | 2.8E+08 | 8.1E+07 | 2.0E+08             | 6.5E+07 |
| <i>A. arilaitensis</i> Re117    | 1.6E+08                                         | 4.7E+07 | 1.9E+08 | 5.6E+07 | 2.3E+08             | 7.1E+07 | 2.4E+08                                         | 4.8E+07 | 5.9E+08 | 1.9E+08 | 1.9E+08             | 5.3E+07 |
| <i>C. casei</i> DPC 5298        | 2.3E+08                                         | 1.3E+07 | 2.2E+08 | 2.8E+07 | 1.9E+08             | 5.4E+07 | 3.3E+08                                         | 7.1E+07 | 3.7E+08 | 1.6E+08 | 3.3E+08             | 6.0E+07 |
| <i>C. casei</i> UCMA 3821       | 1.9E+08                                         | 3.2E+07 | 2.1E+08 | 7.6E+07 | 9.0E+07             | 4.0E+07 | 1.9E+08                                         | 2.9E+07 | 2.3E+08 | 2.0E+07 | 2.9E+08             | 7.5E+07 |
| <i>C. variabile</i> DPC 5310    | 1.9E+08                                         | 3.5E+07 | 1.8E+08 | 6.3E+07 | 2.3E+08             | 6.9E+07 | 1.9E+08                                         | 2.9E+07 | 3.4E+08 | 9.8E+07 | 3.6E+08             | 9.7E+07 |
| <i>C. variabile</i> Mu133       | 4.7E+08                                         | 2.6E+08 | 2.5E+08 | 6.6E+07 | 4.7E+08             | 1.2E+08 | 4.0E+08                                         | 5.9E+07 | 2.4E+08 | 8.9E+07 | 4.4E+08             | 1.8E+08 |
| <i>C. flavescens</i> Mu128      | 2.4E+08                                         | 1.4E+08 | 2.6E+08 | 3.4E+07 | 2.6E+08             | 4.8E+07 | 3.2E+08                                         | 5.3E+07 | 3.7E+08 | 9.6E+07 | 3.0E+08             | 9.8E+07 |
| <i>B. aurantiacum</i> BLE3      | 3.0E+08                                         | 9.8E+07 | 2.2E+08 | 4.1E+07 | 3.6E+08             | 5.4E+07 | 3.2E+08                                         | 7.0E+07 | 3.1E+08 | 1.2E+08 | 2.6E+08             | 4.9E+07 |
| <i>B. aurantiacum</i> ATCC 9174 | 4.7E+08                                         | 2.0E+08 | 5.3E+08 | 1.4E+08 | 2.5E+08             | 5.7E+07 | 2.6E+08                                         | 7.5E+07 | 4.0E+08 | 7.5E+07 | 5.0E+08             | 1.7E+08 |
| <i>B. aurantiacum</i> ATCC 9175 | 2.3E+08                                         | 8.5E+07 | 3.5E+08 | 1.0E+08 | 2.0E+08             | 4.6E+07 | 1.8E+08                                         | 3.0E+07 | 2.5E+08 | 4.0E+07 | 2.3E+08             | 4.4E+07 |
| <i>B. aurantiacum</i> BA171     | 1.4E+08                                         | 4.6E+07 | 1.3E+08 | 4.3E+07 | 9.0E+07             | 1.5E+07 | 2.3E+08                                         | 7.5E+07 | 4.1E+08 | 1.3E+08 | 3.6E+08             | 1.2E+08 |
| <i>B. aurantiacum</i> 2M23      | 9.3E+07                                         | 3.8E+07 | 5.0E+07 | 1.1E+07 | 1.8E+08             | 6.5E+07 | 2.4E+08                                         | 5.7E+07 | 2.3E+08 | 6.4E+07 | 2.9E+08             | 6.4E+07 |
| <i>B. antiquum</i> 918          | 2.3E+08                                         | 7.6E+07 | 3.9E+08 | 1.5E+08 | 5.0E+08             | 1.8E+08 | 2.6E+08                                         | 6.7E+07 | 2.9E+08 | 7.6E+07 | 2.9E+08             | 8.4E+07 |
| <i>B. linens</i> ATCC 9172      | 3.0E+08                                         | 4.2E+07 | 6.9E+08 | 2.5E+08 | 6.2E+08             | 2.6E+08 | 3.2E+08                                         | 8.5E+07 | 2.9E+08 | 8.6E+07 | 3.6E+08             | 6.4E+07 |

TABLE S4. Effect of the addition of iron and desferrioxamine B on the counts of *Lactococcus lactis* (lactic acid bacteria) in the model cheeses. The cheese curds were inoculated with a yeast (*Debaryomyces hansenii*) and different strains of aerobic ripening bacteria. The values are the means of three biological replicates (separate cheeses). Values in bold correspond to significant differences (Student test,  $P < 0.05$ ) between the cheeses supplemented with iron or desferrioxamine B and the corresponding control cheeses. SD = Standard deviation.

| Aerobic ripening bacteria:      | <i>Lactococcus lactis</i> at 12 days (cfu/g) |         |                |         |                     |         | <i>Lactococcus lactis</i> at 16 days (cfu/g) |         |                |         |                     |         |
|---------------------------------|----------------------------------------------|---------|----------------|---------|---------------------|---------|----------------------------------------------|---------|----------------|---------|---------------------|---------|
|                                 | Control                                      |         | + Iron         |         | + Desferrioxamine B |         | Control                                      |         | + Iron         |         | + Desferrioxamine B |         |
|                                 | Mean                                         | SD      | Mean           | SD      | Mean                | SD      | Mean                                         | SD      | Mean           | SD      | Mean                | SD      |
| <i>A. arilaitensis</i> 3M03     | 3.2E+07                                      | 1.9E+06 | 3.2E+07        | 6.4E+06 | 2.4E+07             | 9.1E+06 | 3.4E+07                                      | 9.1E+06 | 2.5E+07        | 5.5E+06 | <b>1.0E+07</b>      | 2.5E+06 |
| <i>A. arilaitensis</i> Mu107    | 3.9E+07                                      | 1.2E+07 | 3.2E+07        | 8.2E+06 | 3.4E+07             | 7.4E+06 | 2.7E+07                                      | 5.4E+06 | 3.4E+07        | 9.6E+06 | 2.6E+07             | 2.9E+06 |
| <i>A. arilaitensis</i> Ma107    | 5.3E+07                                      | 1.5E+07 | 2.7E+07        | 1.2E+07 | 1.9E+07             | 9.9E+06 | 3.3E+07                                      | 7.9E+06 | 2.7E+07        | 7.3E+06 | 4.0E+07             | 1.8E+06 |
| <i>A. arilaitensis</i> GMPA29   | 3.0E+07                                      | 6.1E+06 | 2.7E+07        | 9.4E+06 | 5.4E+07             | 1.1E+07 | 4.8E+07                                      | 1.1E+07 | 4.5E+07        | 1.3E+07 | 6.3E+07             | 1.3E+07 |
| <i>A. arilaitensis</i> 2L34     | 2.4E+07                                      | 3.7E+06 | 4.0E+07        | 8.1E+06 | 2.5E+07             | 6.4E+06 | 4.4E+07                                      | 6.6E+06 | 1.1E+08        | 3.4E+07 | 9.3E+07             | 2.6E+07 |
| <i>A. arilaitensis</i> Ep104    | 2.0E+07                                      | 5.0E+06 | 3.0E+07        | 2.7E+06 | <b>6.6E+07</b>      | 1.2E+07 | 4.4E+07                                      | 5.7E+06 | 8.3E+07        | 2.2E+07 | 6.8E+07             | 1.8E+07 |
| <i>A. arilaitensis</i> Re117    | 4.0E+07                                      | 2.2E+07 | 2.6E+07        | 1.0E+07 | 2.4E+07             | 6.5E+06 | 5.5E+07                                      | 3.6E+07 | 1.0E+08        | 4.5E+07 | 1.3E+08             | 2.5E+07 |
| <i>C. casei</i> DPC 5298        | 1.3E+07                                      | 3.6E+06 | 1.8E+07        | 4.0E+06 | 1.2E+07             | 3.8E+06 | 2.5E+07                                      | 8.7E+06 | 3.4E+07        | 1.2E+07 | 1.6E+07             | 1.2E+06 |
| <i>C. casei</i> UCMA 3821       | 3.8E+07                                      | 1.0E+07 | 4.7E+07        | 5.6E+06 | 1.6E+07             | 6.2E+06 | 4.2E+07                                      | 1.7E+07 | 3.7E+07        | 1.4E+07 | 3.6E+07             | 5.2E+06 |
| <i>C. variabile</i> DPC 5310    | 3.0E+07                                      | 6.0E+06 | 2.7E+07        | 9.0E+06 | 4.0E+07             | 1.4E+07 | 2.7E+07                                      | 6.4E+05 | 5.9E+07        | 1.7E+07 | 3.7E+07             | 9.0E+06 |
| <i>C. variabile</i> Mu133       | 3.1E+07                                      | 2.3E+06 | 2.7E+07        | 3.8E+06 | 3.2E+07             | 6.3E+06 | 4.7E+07                                      | 1.2E+07 | <b>1.3E+07</b> | 1.6E+06 | 7.9E+07             | 3.2E+07 |
| <i>C. flavescens</i> Mu128      | 4.8E+06                                      | 7.0E+05 | <b>1.2E+07</b> | 1.2E+06 | 8.4E+06             | 1.9E+06 | 2.7E+07                                      | 2.7E+06 | 2.5E+07        | 8.1E+06 | 2.3E+07             | 8.0E+06 |
| <i>B. aurantiacum</i> BLE3      | 2.3E+07                                      | 5.7E+06 | 1.6E+07        | 2.6E+06 | 2.4E+07             | 3.9E+06 | 4.5E+07                                      | 2.6E+06 | 4.7E+07        | 6.6E+06 | 3.4E+07             | 6.8E+06 |
| <i>B. aurantiacum</i> ATCC 9174 | 3.3E+07                                      | 8.0E+06 | 6.2E+07        | 1.4E+07 | 1.9E+07             | 4.2E+06 | 3.7E+07                                      | 3.5E+06 | 4.8E+07        | 1.2E+07 | 5.0E+07             | 1.2E+07 |
| <i>B. aurantiacum</i> ATCC 9175 | 2.5E+07                                      | 1.2E+06 | 2.8E+07        | 7.8E+06 | 2.2E+07             | 6.3E+06 | 2.9E+07                                      | 4.4E+06 | 2.9E+07        | 2.8E+06 | 2.0E+07             | 3.2E+06 |
| <i>B. aurantiacum</i> BA171     | 2.4E+07                                      | 4.7E+06 | 2.0E+07        | 5.3E+06 | 2.1E+07             | 3.3E+06 | 3.0E+07                                      | 3.4E+06 | 3.1E+07        | 1.8E+06 | 2.0E+07             | 6.6E+06 |
| <i>B. aurantiacum</i> 2M23      | 3.0E+07                                      | 5.4E+06 | 2.6E+07        | 8.6E+06 | 1.6E+07             | 5.2E+06 | 3.0E+07                                      | 1.4E+06 | 2.1E+07        | 5.6E+06 | 2.4E+07             | 3.3E+06 |
| <i>B. antiquum</i> 918          | 2.5E+07                                      | 1.0E+07 | 2.7E+07        | 1.3E+07 | 2.0E+07             | 1.1E+07 | 3.1E+07                                      | 6.5E+06 | 3.4E+07        | 8.2E+06 | 2.5E+07             | 6.4E+06 |
| <i>B. linens</i> ATCC 9172      | 3.4E+07                                      | 7.8E+06 | 2.3E+07        | 8.4E+06 | 1.8E+07             | 4.9E+06 | 5.6E+07                                      | 2.0E+07 | 2.9E+07        | 6.4E+06 | 4.1E+07             | 4.0E+06 |

TABLE S5. Effect of the addition of iron and desferrioxamine B on the growth of ripening bacteria in the model cheeses. The cheese curds were inoculated with a yeast (*Debaryomyces hansenii*) and different strains of aerobic ripening bacteria. The values are the counts of ripening bacteria in the cheeses supplemented with iron or desferrioxamine B, divided by the counts in the control cheeses (means of three biological replicates). Values in bold correspond to significant differences (counts; Student test,  $P < 0.05$ ) between the cheeses supplemented with iron or desferrioxamine B and the corresponding control cheeses.

| Aerobic ripening bacteria:      | 12 days                                                       |                                                                          | 16 days                                                       |                                                                          |
|---------------------------------|---------------------------------------------------------------|--------------------------------------------------------------------------|---------------------------------------------------------------|--------------------------------------------------------------------------|
|                                 | Counts in iron-supplemented cheeses/counts in control cheeses | Counts in desferrioxamine-supplemented cheeses/counts in control cheeses | Counts in iron-supplemented cheeses/counts in control cheeses | Counts in desferrioxamine-supplemented cheeses/counts in control cheeses |
| <i>A. arilaitensis</i> 3M03     | <b>3.5</b>                                                    | <b>3.5</b>                                                               | 1.5                                                           | 1.8                                                                      |
| <i>A. arilaitensis</i> Mu107    | 1.2                                                           | <b>25.4</b>                                                              | <b>7.1</b>                                                    | <b>3.3</b>                                                               |
| <i>A. arilaitensis</i> Ma107    | <b>20.3</b>                                                   | <b>20.9</b>                                                              | <b>4.9</b>                                                    | <b>4.0</b>                                                               |
| <i>A. arilaitensis</i> GMPA29   | <b>7.6</b>                                                    | <b>221.4</b>                                                             | <b>3.7</b>                                                    | <b>2.7</b>                                                               |
| <i>A. arilaitensis</i> 2L34     | <b>8.8</b>                                                    | <b>21.4</b>                                                              | <b>8.0</b>                                                    | <b>12.0</b>                                                              |
| <i>A. arilaitensis</i> Ep104    | <b>45.1</b>                                                   | <b>76.0</b>                                                              | <b>12.9</b>                                                   | <b>9.9</b>                                                               |
| <i>A. arilaitensis</i> Re117    | <b>3.2</b>                                                    | <b>12.1</b>                                                              | <b>10.9</b>                                                   | <b>14.9</b>                                                              |
| <i>C. casei</i> DPC 5298        | <b>13.5</b>                                                   | <b>57.5</b>                                                              | <b>5.0</b>                                                    | <b>3.4</b>                                                               |
| <i>C. casei</i> UCMA 3821       | <b>4.5</b>                                                    | 1.1                                                                      | 1.4                                                           | <b>3.0</b>                                                               |
| <i>C. variabile</i> DPC 5310    | 2.0                                                           | <b>11.9</b>                                                              | 2.7                                                           | <b>15.1</b>                                                              |
| <i>C. variabile</i> Mu133       | 2.3                                                           | <b>24.2</b>                                                              | <b>5.8</b>                                                    | <b>15.0</b>                                                              |
| <i>C. flavescens</i> Mu128      | 1.5                                                           | 1.7                                                                      | 1.2                                                           | 0.8                                                                      |
| <i>B. aurantiacum</i> BLE3      | <b>3.8</b>                                                    | <b>29.1</b>                                                              | 1.0                                                           | 1.2                                                                      |
| <i>B. aurantiacum</i> ATCC 9174 | 0.4                                                           | <b>7.8</b>                                                               | <b>4.0</b>                                                    | <b>10.7</b>                                                              |
| <i>B. aurantiacum</i> ATCC 9175 | 2.2                                                           | <b>7.2</b>                                                               | 2.4                                                           | 2.1                                                                      |
| <i>B. aurantiacum</i> BA171     | <b>3.5</b>                                                    | <b>3.3</b>                                                               | 1.0                                                           | 1.2                                                                      |
| <i>B. aurantiacum</i> 2M23      | <b>7.0</b>                                                    | <b>74.0</b>                                                              | <b>37.7</b>                                                   | <b>212.2</b>                                                             |
| <i>B. antiquum</i> 918          | <b>4.3</b>                                                    | <b>32.7</b>                                                              | 1.6                                                           | <b>4.1</b>                                                               |
| <i>B. linens</i> ATCC 9172      | 1.6                                                           | <b>192.2</b>                                                             | <b>11.7</b>                                                   | <b>290.5</b>                                                             |

TABLE S6. Effect of iron addition on the expression of *Arthrobacter arilaitensis* Re117 genes in model cheeses after 16 days of ripening. Values correspond to the biological replicates number 2 and number 3 (cheese replicates), and are the means obtained from three separate RNA extractions of a control cheese and of a cheese supplemented with 1 mg of iron per kg.

| Gene                                      | Product                                                     | IdeR binding site <sup>a</sup> | NEL <sup>b</sup>       |      | NEL <sup>b</sup>       |      |
|-------------------------------------------|-------------------------------------------------------------|--------------------------------|------------------------|------|------------------------|------|
|                                           |                                                             |                                | biological replicate 2 |      | biological replicate 3 |      |
|                                           |                                                             |                                | Mean                   | STD  | Mean                   | STD  |
| <b>Siderophore biosynthesis genes:</b>    |                                                             |                                |                        |      |                        |      |
| AARI_32900                                | isochorismate synthase, EC 5.4.4.2                          | upstream AARI_32920            | 0.28                   | 0.02 | 0.17                   | 0.01 |
| <b>iron/siderophore binding proteins:</b> |                                                             |                                |                        |      |                        |      |
| AARI_03970                                | iron-siderophore ABC transporter, substrate-binding protein | no                             | 1.18                   | 0.11 | 1.01                   | 0.17 |
| AARI_26370                                | iron-siderophore ABC transporter, substrate-binding protein | upstream AARI_26370            | 0.27                   | 0.06 | 0.21                   | 0.05 |
| AARI_30210                                | iron-siderophore ABC transporter, substrate-binding protein | no                             | 1.66                   | 0.18 | 1.43                   | 0.12 |
| AARI_32790                                | iron-siderophore ABC transporter, substrate-binding protein | upstream AARI_32790            | 0.30                   | 0.01 | 0.32                   | 0.07 |

<sup>a</sup> Iron-dependent regulator binding site. Consensus sequence TTAGGTTAGGCTAACCTAA, up to five mismatches allowed.

<sup>b</sup> Normalized Expression Level: Expression of the considered gene in the cheese supplemented with iron, divided by the expression in the control cheese (calibrator), using *ftsZ*, *tuf* and *rpoB* as reference genes.

TABLE S7. Effect of desferrioxamine B (siderophore) addition on the expression of *Arthrobacter arilaitensis* Re117 genes in model cheeses after 16 days of ripening. Values correspond to the biological replicates number 2 and number 3 (cheese replicates), and are the means obtained from three separate RNA extractions of a control cheese and of a cheese supplemented with 50  $\mu$ moles of desferrioxamine B per kg.

| Gene                                      | Product                                                     | IdeR binding site <sup>a</sup> | NEL <sup>b</sup>       |      | NEL <sup>b</sup>       |      |
|-------------------------------------------|-------------------------------------------------------------|--------------------------------|------------------------|------|------------------------|------|
|                                           |                                                             |                                | biological replicate 2 |      | biological replicate 3 |      |
|                                           |                                                             |                                | Mean                   | STD  | Mean                   | STD  |
| <b>Siderophore biosynthesis genes:</b>    |                                                             |                                |                        |      |                        |      |
| AARI_32900                                | isochorismate synthase, EC 5.4.4.2                          | upstream AARI_32920            | 1.55                   | 0.13 | 1.36                   | 0.04 |
| <b>iron/siderophore binding proteins:</b> |                                                             |                                |                        |      |                        |      |
| AARI_03970                                | iron-siderophore ABC transporter, substrate-binding protein | no                             | 5.59                   | 0.79 | 3.65                   | 0.07 |
| AARI_26370                                | iron-siderophore ABC transporter, substrate-binding protein | upstream AARI_26370            | 1.27                   | 0.15 | 1.13                   | 0.20 |
| AARI_30210                                | iron-siderophore ABC transporter, substrate-binding protein | no                             | 1.83                   | 0.14 | 1.45                   | 0.17 |
| AARI_32790                                | iron-siderophore ABC transporter, substrate-binding protein | upstream AARI_32790            | 1.16                   | 0.08 | 1.30                   | 0.10 |

<sup>a</sup> Iron-dependent regulator binding site. Consensus sequence TTAGGTTAGGCTAACCTAA, up to five mismatches allowed.

<sup>b</sup> Normalized Expression Level: Expression of the considered gene in the cheese supplemented with desferrioxamine B, divided by the expression in the control cheese (calibrator), using *ftsZ*, *tuf* and *rpoB* as reference genes.

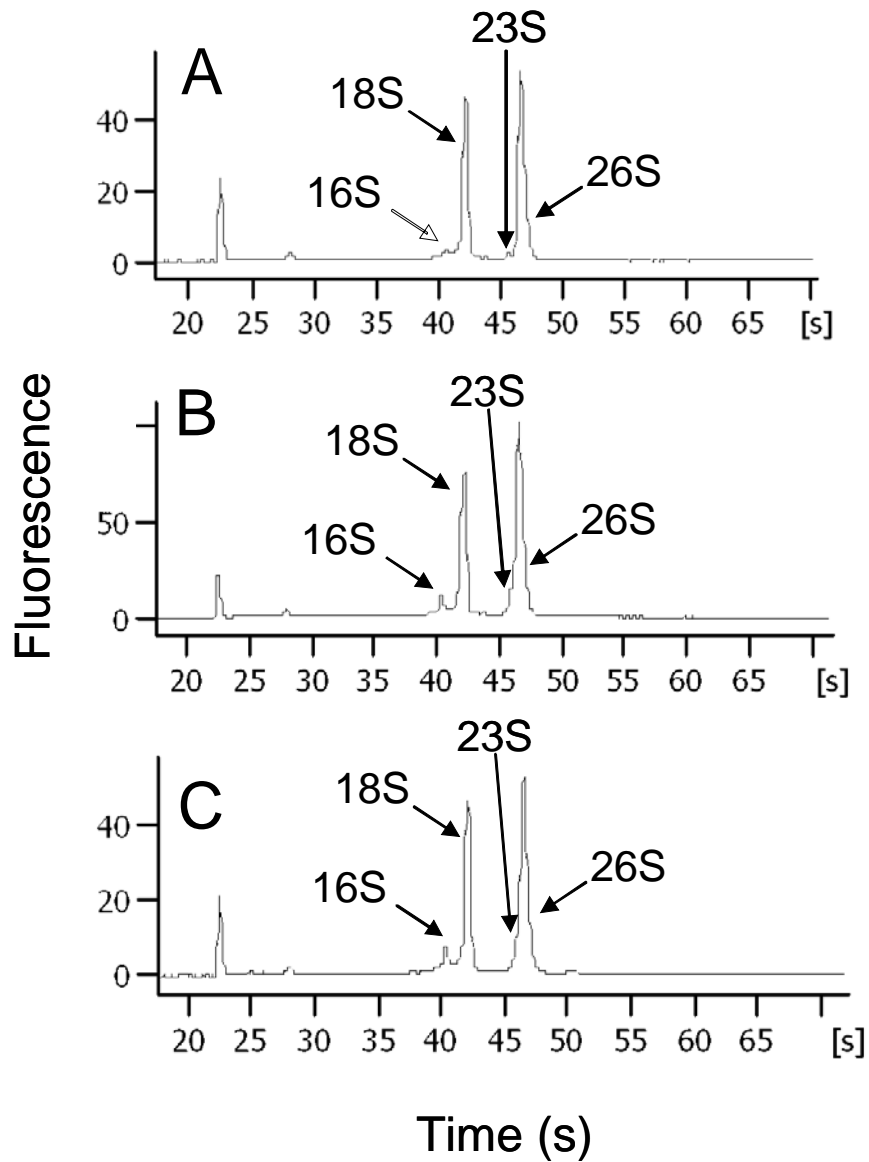

FIG. S1. Electrophoregrams of RNA preparations (Agilent Bioanalyzer) from cheeses after 16 days of ripening with the ripening strain, *Arthrobacter arilaitensis* Re117. A: control cheese; B: cheese supplemented with iron; C: cheese supplemented with desferrioxamine B.



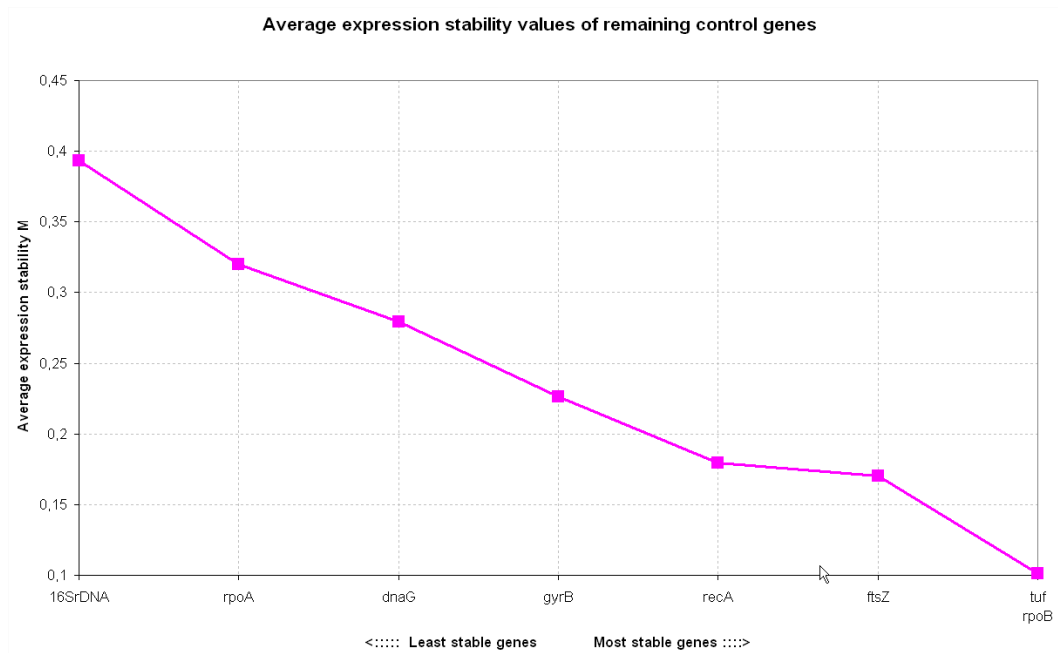

FIG. S2. Average expression stability values ( $M$ ) of remaining control genes during stepwise exclusion of the least stable control genes (left point = all eight candidate reference genes; right point = reference genes *tuf* and *rpoB*).
